# Supplementary material
Source: publisher figshare collection journal article supplement (https://springernature.figshare.com/ndownloader/files/20042171)
Supplement: Supplementary file [file 20042171]

# **Protein tyrosine kinase 2: A novel therapeutic target to overcome acquired EGFR-TKI resistance in non-small cell lung cancer**

Xuexia Tong<sup>1,2</sup>, Ryosuke Tanino<sup>1</sup>, Rong Sun<sup>1</sup>, Yukari Tsubata<sup>1\*</sup>, Tamio Okimoto<sup>1</sup>, Mayumi Takechi<sup>3</sup>, Takeshi Isobe<sup>1</sup>

<sup>1</sup>Department of Internal Medicine, Division of Medical Oncology & Respiratory Medicine, Faculty of Medicine, Shimane University, Shimane, Japan

<sup>2</sup>Department of Respiratory and Critical Care Medicine, General Hospital of Ningxia Medical University, Ningxia, China

<sup>3</sup>Department of Experimental Animals, Interdisciplinary Center for Science Research, Organization for Research and Academic Information, Shimane University, Shimane, Japan

## **Additional file 1**

**Figure S1** – PC-9 and PC-9/PEM do not express FGFR1 or FGFR4 proteins.

**Figure S2** – PD173074 sensitized PC-9/PEM to erlotinib but BLU-554 and nintedanib did not.

**Figure S3** – Representative pictures and body weights of xenografts.

**Figure S4** – Establishment of erlotinib-resistant NSCLC cell lines.

**Figure S5** – Sequence alignment between PTK2 (Y407 to F729) and FGFR1 (Y463 to L819).

**Table S1** – The sequences for primers used in RT- qPCR.

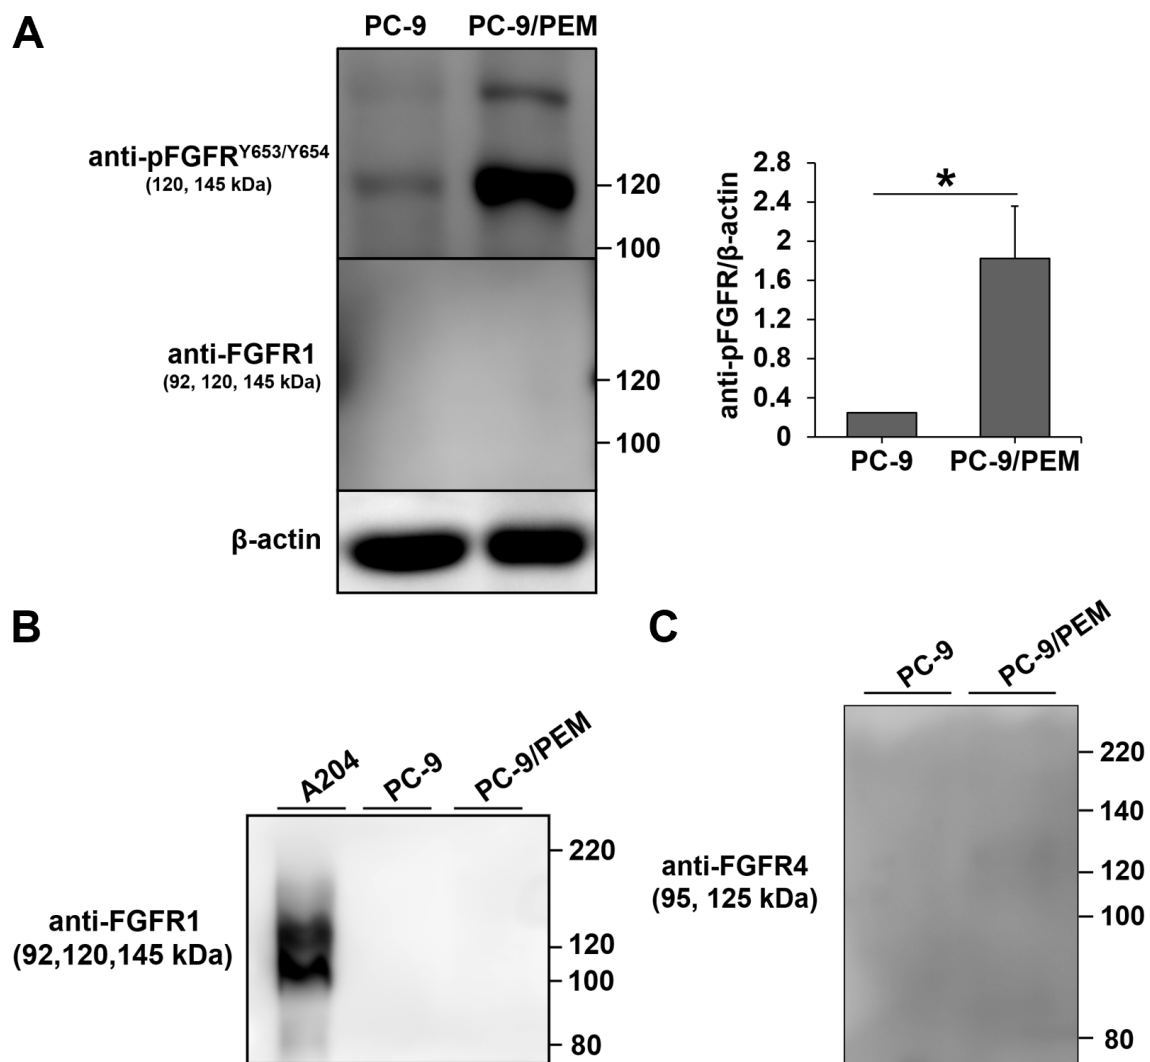

**Figure S1** PC-9 and PC-9/PEM do not express FGFR1 or FGFR4 proteins. **A**, Representative immunoblots of protein binding to anti-pFGFR<sup>Y653/Y654</sup> and total FGFR1 in PC-9 and PC-9/PEM cells and ratio of phosphorylated protein to β-actin. Data are means (SD), n = 3. \*, *P* < 0.05 by Student's *t*-test. **B**, Immunoblots of total FGFR1 in PC-9 and PC-9/PEM cells. A204 protein lysate was used as the positive control. **C**, immunoblots of total FGFR4 in PC-9 and PC-9/PEM cells.

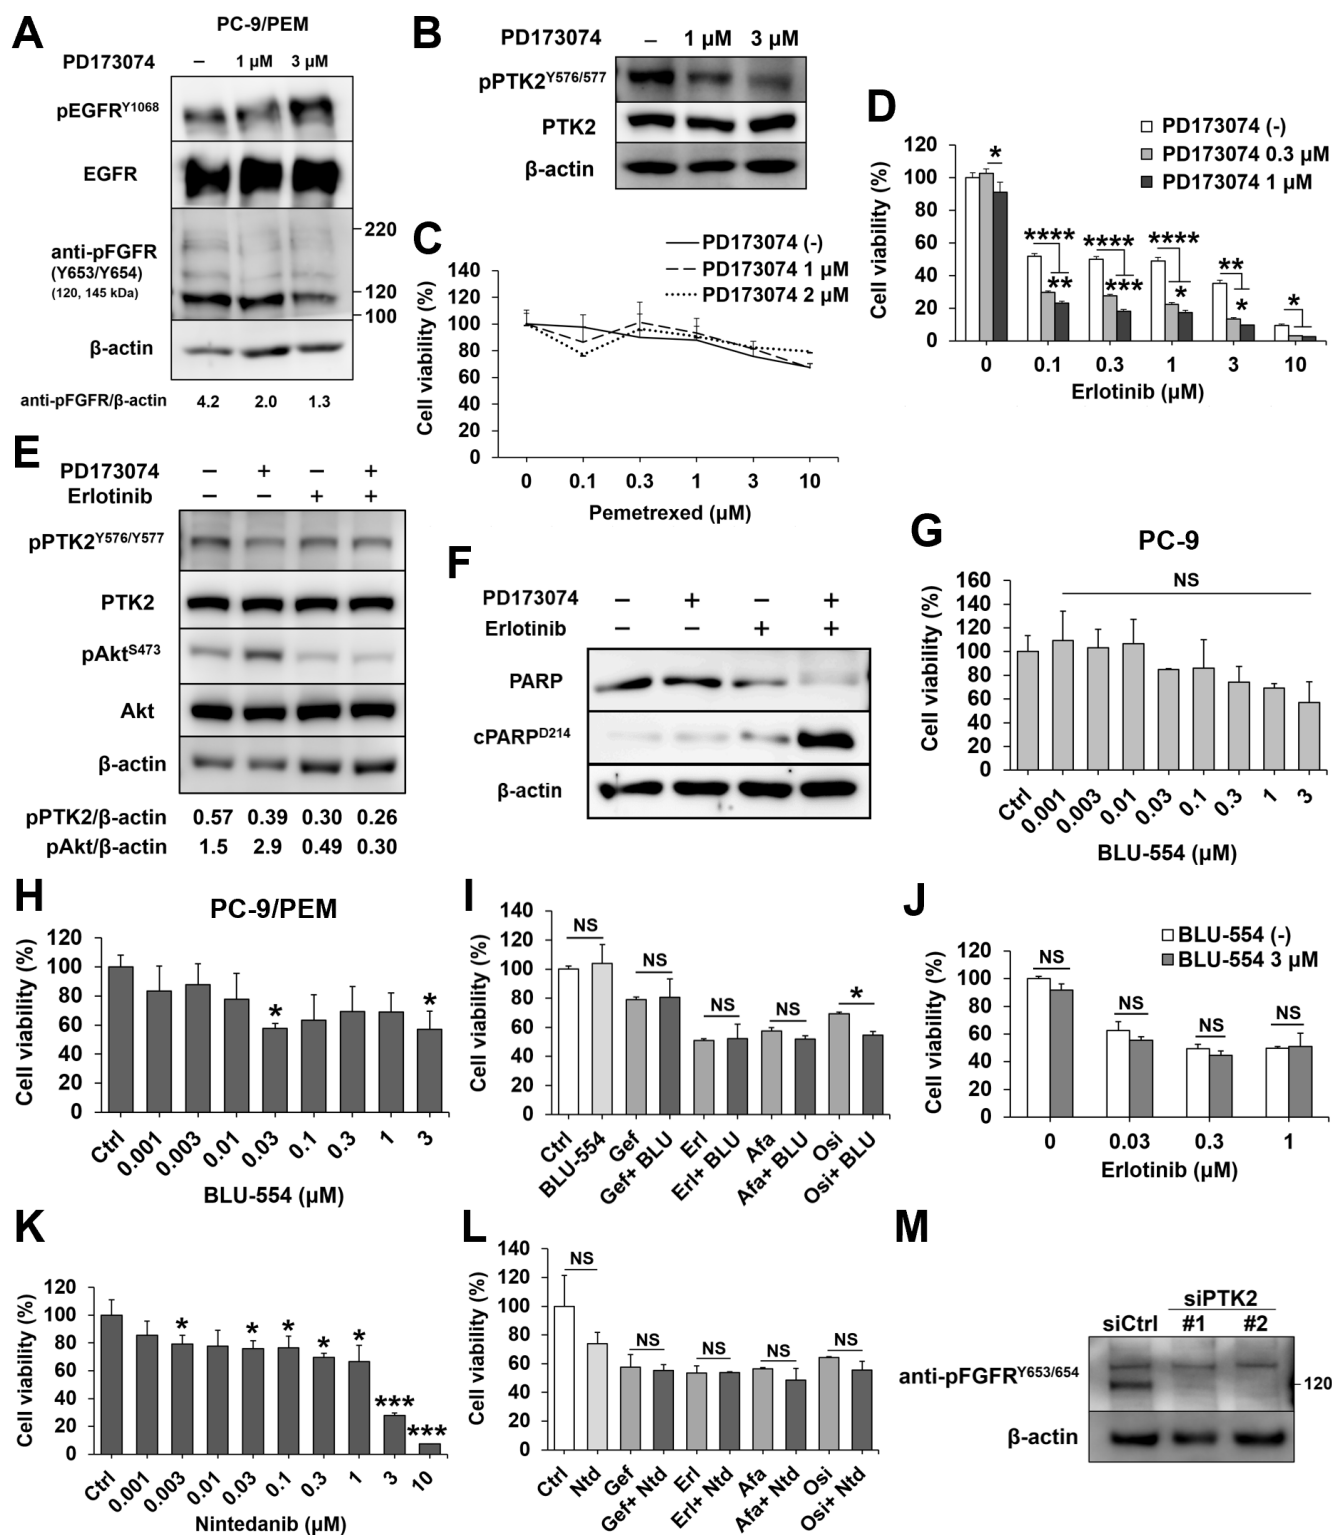

**Figure S2** PD173074 sensitized PC-9/PEM to erlotinib but BLU-554 and nintedanib did not. **A**, Immunoblots of the phosphorylated and total EGFR, the protein binding to anti-pFGFR<sup>Y653/Y654</sup> and total FGFR1 in PC-9 and PC-9/PEM cells treated with PD173074 at the indicated concentration for 96 h. **B**, Immunoblots of phosphorylated- and total PTK2 in PC-9 and PC-9/PEM cells treated with the FGFR1 inhibitor PD173074 at the indicated concentration for 96 h. **C**, Viability of PC-

9/PEM cells with or without PD173074 and pemetrexed at the indicated concentrations for 72 h. Data are means (SD), n = 3. **D**, Viability of PC-9/PEM cells with or without PD173074 and erlotinib at the indicated concentrations for 96 h. Data are means (SD), n = 3. \*,  $P < 0.05$ ; \*\*,  $P < 0.01$ ; \*\*\*,  $P < 0.0001$  by one-way ANOVA and Tukey's HSD multiple comparisons test. **E**, Immunoblots of the indicated proteins in PC-9 and PC-9/PEM cells with or without 1  $\mu$ M PD173074 and 1  $\mu$ M erlotinib for 72 h. **F**, Immunoblots of cleaved PARP and PARP in PC-9 and PC-9/PEM cells with or without 1  $\mu$ M PD173074 and 1  $\mu$ M erlotinib for 72 h. **G-H**, Viabilities of PC-9 (**G**) and PC-9/PEM (**H**) cells treated with the FGFR4 inhibitor BLU-554 at the indicated concentrations for 96 h. Data are means (SD), n = 3. \*,  $P < 0.05$ ; \*\*,  $P < 0.01$ ; \*\*\*,  $P < 0.0001$ . Data for treated and untreated cells were compared by one-way ANOVA and Tukey's HSD multiple comparisons test. **I**, viability of PC-9/PEM cells with or without 3  $\mu$ M BLU-554 and 0.01  $\mu$ M gefitinib (Gef), 1  $\mu$ M erlotinib (Erl), 0.001  $\mu$ M afatinib (Afa), or 0.01  $\mu$ M osimertinib (Osi) for 96 h. Data are means (SD), n = 3. \*,  $P < 0.05$ ; NS, not significant by one-way ANOVA and Tukey's HSD multiple comparisons test. **J**, Viability of PC-9/PEM cells with or without BLU-554 and erlotinib at the indicated concentration for 96 h. Data are means (SD), n = 3. NS, not significant by Student's *t*-test. **K**, PC-9/PEM cells treated with the multi-kinase inhibitor nintedanib at the indicated concentrations for 96 h. Data are means (SD), n = 3. \*,  $P < 0.05$ ; \*\*\*,  $P < 0.001$ . Data for treated and untreated cells were compared by one-way ANOVA and Tukey's HSD multiple comparisons test. **L**, Viability of PC-9/PEM cells with or without 0.01  $\mu$ M nintedanib (Ntd) and 0.01  $\mu$ M gefitinib (Gef), 0.01  $\mu$ M erlotinib (Erl), 0.0003  $\mu$ M afatinib (Afa), or 0.03  $\mu$ M osimertinib (Osi) for 96 h. Data are means (SD), n = 3. NS, not significant by one-way ANOVA and Tukey's HSD multiple comparisons test. **M**, Immunoblots of the protein binding to anti-pFGFR<sup>Y653/Y654</sup> in PC-9/PEM clone1 cells transfected with siRNAs against *PTK2*. The siCtrl was used as a negative control.

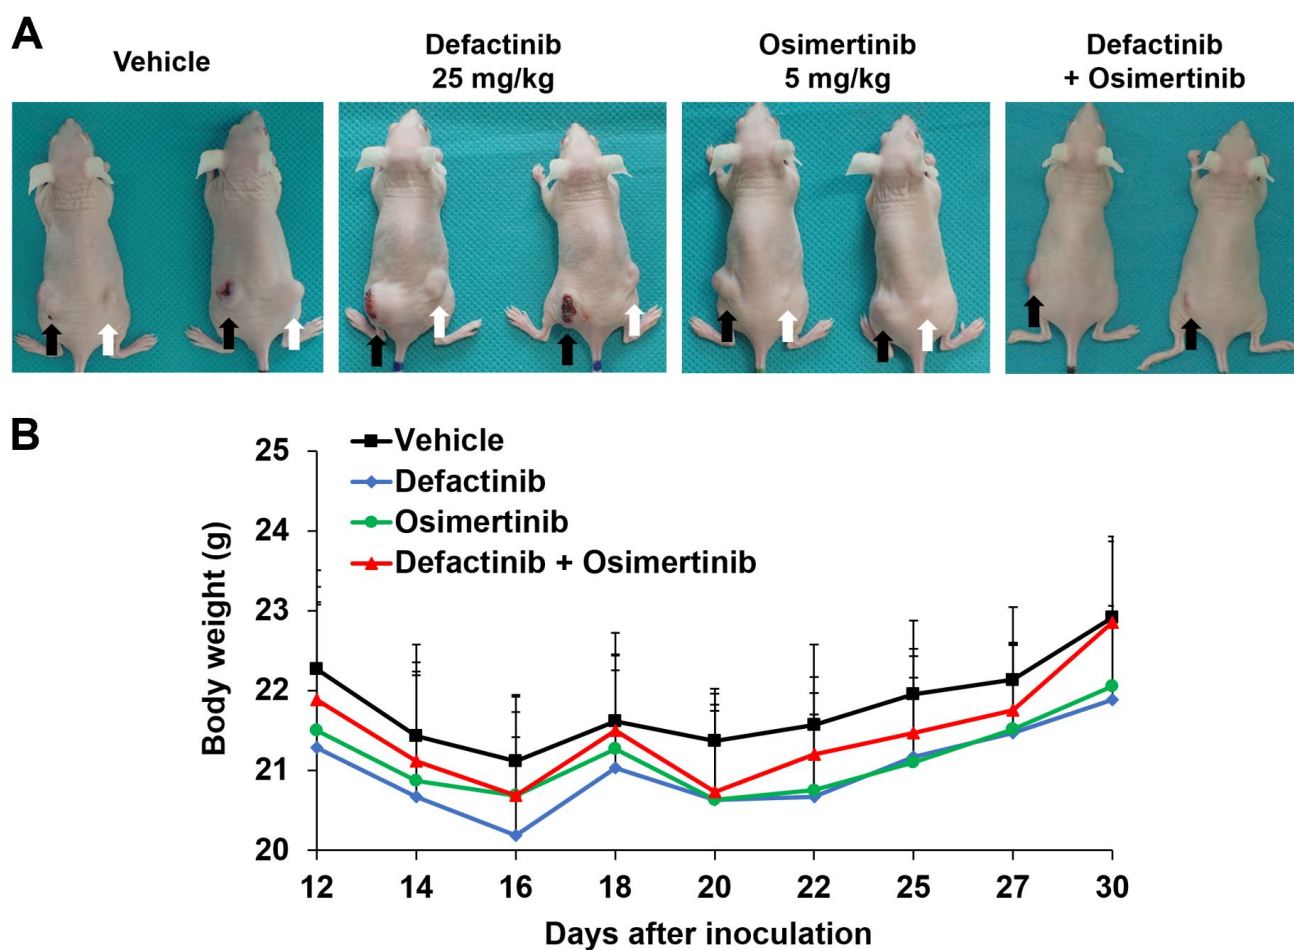

**Figure S3** Representative pictures and body weights of xenografts. **A**, Xenografted mice with tumors at day 30. Black arrows indicate PC-9 tumors. White arrows indicate PC-9/PEM clone1 tumors. **B**, Body weights up to day 30. Data are means (SD); n = 6. Groups were compared by one-way ANOVA and Tukey's HSD multiple comparisons test.

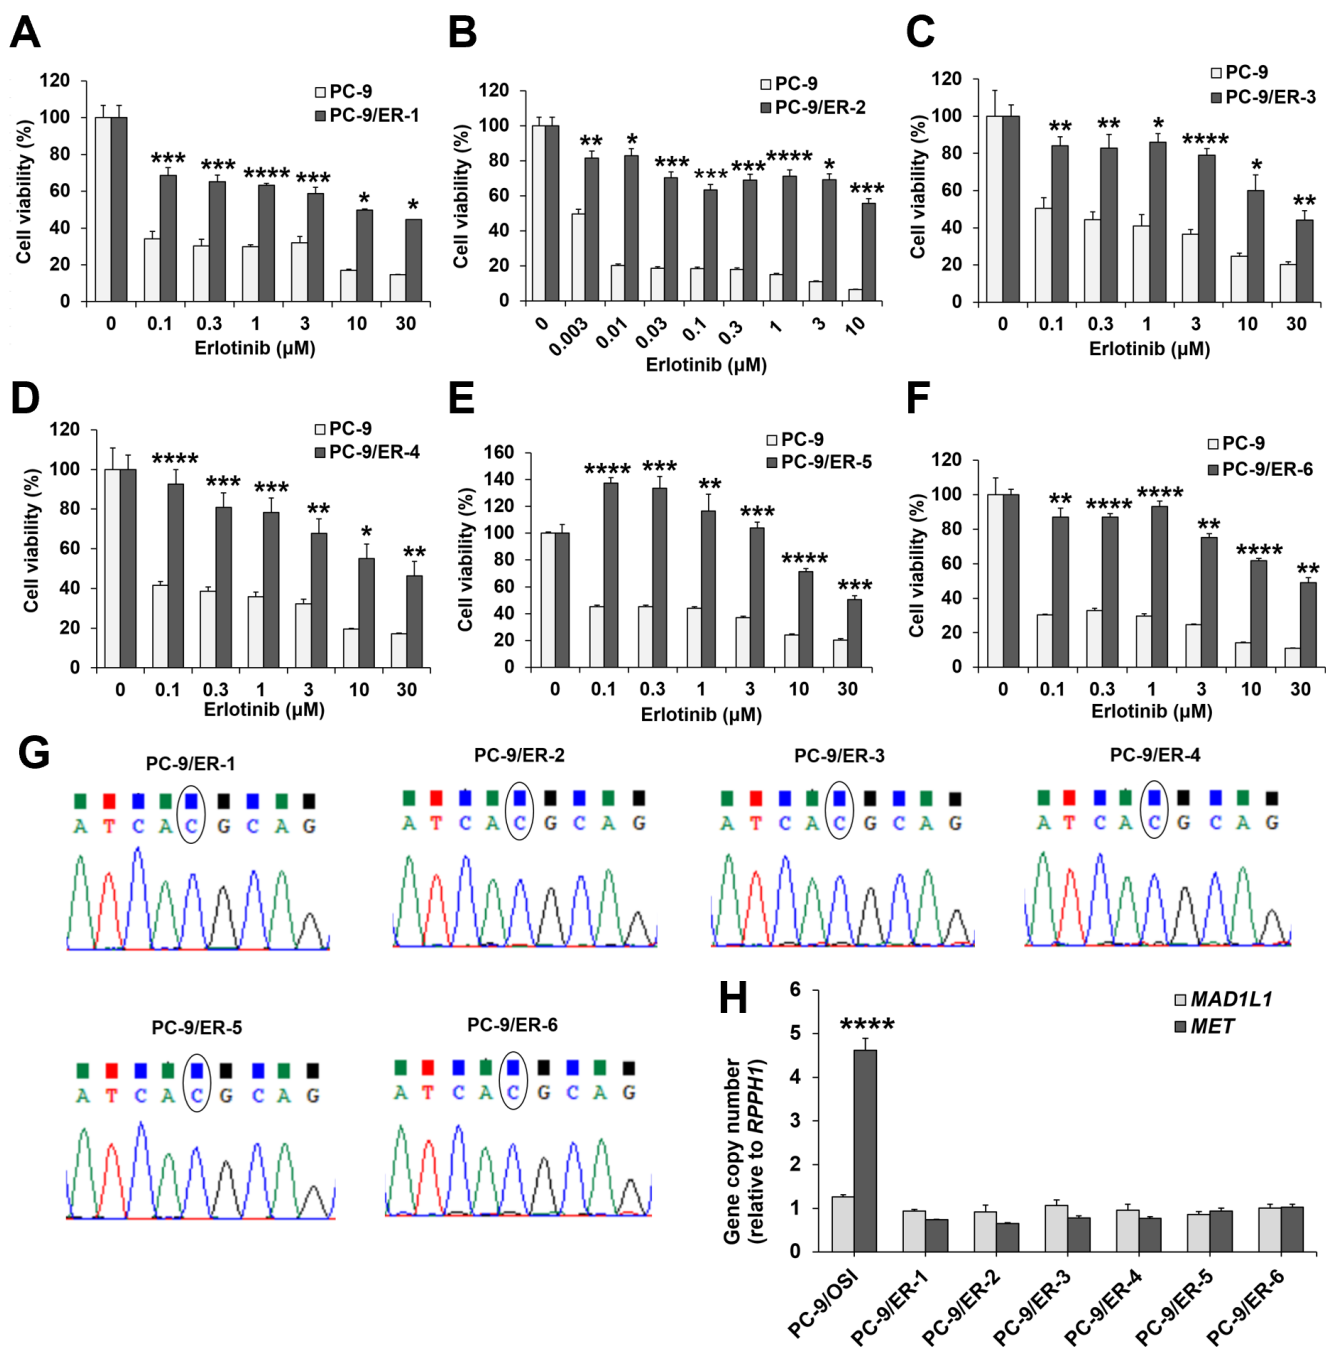

**Figure S4** Establishment of erlotinib-resistant NSCLC cell lines. **A-F**, Viabilities of PC-9 and PC-9/ER-1 (**A**), PC-9/ER-2 (**B**), PC-9/ER-3 (**C**), PC-9/ER-4 (**D**), PC-9/ER-5 (**E**), and PC-9/ER-6 (**F**) cells treated with erlotinib at the indicated concentrations for 72 h. Data are means (SD), n = 3. \*,  $P < 0.05$ ; \*\*,  $P < 0.01$ ; \*\*\*,  $P < 0.001$ ; \*\*\*\*,  $P < 0.0001$ . Data were compared with those for PC-9 cells by Student's *t*-test. **G**, Direct sequencing chromatogram at the p.T790 (c.2369C) site of EGFR in PC-9/ER-1 – 6. **H**, Copy number quantification of genomic DNA extracted from PC-9, PC-9/ER-1-6, and PC-9/OSI. *MET* or *MAD1L1* copy numbers relative to that for *RPPH1* are shown. *MAD1L1* was the negative control. Data are means (SD), n = 3. \*\*\*\*,  $P < 0.0001$  by Student's *t*-test.

Range 1: 463 to 819 [Graphics](#)

▼ Next Match ▲ Previous Match

| Score         | Expect                                                        | Method                       | Identities   | Positives    | Gaps       |
|---------------|---------------------------------------------------------------|------------------------------|--------------|--------------|------------|
| 194 bits(494) | 2e-55                                                         | Compositional matrix adjust. | 120/357(34%) | 187/357(52%) | 34/357(9%) |
| Query 407     | YTMPSTRDYEIQRERIELGRCIGEGQFGDV--HQGIYMSPENP--ALAVAIKTCKNCTSD  |                              |              |              | 462        |
| Sbjct 463     | Y +P +E+ R+R+ LG+ +GEG FG V + I + + P VA+K K+ ++              |                              |              |              | 522        |
| Query 463     | SVREKFLQEALTMRF-DHPHIVKLIGVITEN-PVWIIMELCTLGELRSFLQVRK-----   |                              |              |              | 515        |
| Sbjct 523     | + E M+ H +I+ L+G T++ P+++I+E + G LR +LQ R+                    |                              |              |              | 582        |
| Query 516     | -----YSLDLASLILYAYQLSTALAYLESKRFBVHRDIAARNVLVSSNDCVKGDF       |                              |              |              | 565        |
| Sbjct 583     | L L+ AYQ++ + YL SK+ +HRD+AARNVLV+ ++ +K+ DF                   |                              |              |              | 642        |
| Query 566     | GLSRYMEDSTYYK-ASKGKLPIKWMAPESINFRFRFSASDVWVMFGVCMWEILMHGVKPFQ |                              |              |              | 624        |
| Sbjct 643     | GL+R + YYK + G+LP+KWMAPPE++ R +T SDVW FGV +WEI G P+           |                              |              |              | 702        |
| Query 625     | GVKNNDVIGRIENGERLPMPPNCPPTLYSLMTKCWAYDPSRRPRFTELKAQLSTILEEEK  |                              |              |              | 684        |
| Sbjct 703     | GV ++ ++ G R+ P NC LY +M CW PS+RP F +L L I+                   |                              |              |              | 762        |
| Query 685     | AQQEERMRM-----ESRRQATVSW--DSGGSDEA-PPKPSRPGYSPRSSEGF          |                              |              |              | 729        |
| Sbjct 763     | Q+ + M R +T S DS S E P +P P +P+ ++ G                          |                              |              |              | 819        |

Query: PTK2 (Q05397) Y576/Y577

Sbjct: FGFR1 (P11362) Y653/Y654

**Figure S5** Sequence alignment between PTK2 (Y407 to F729) and FGFR1 (Y463 to L819). Blue indicates serial tyrosine sites of PTK2 and FGFR1.

**Table S1** The sequences for primers used in RT- qPCR.

| <b>Gene</b>   | <b>Forward primer (5' to 3')</b> | <b>Reverse primer (5' to 3')</b> |
|---------------|----------------------------------|----------------------------------|
| <i>IGF-1R</i> | TGGTGGAGAACGACCATATCC            | CGATTAAGTGAAGAGGAGTTCTGA         |
| <i>PXN</i>    | ACGTCTACAGCTTCCCCAACAA           | AGCAGGCGGTTCGAGTTCA              |
| <i>ITGβ1</i>  | CATCTGCGAGTGTGGTGTCT             | AAGGCTCTGCACTGAACACA             |
| <i>Gab1</i>   | ATCAGAAACGCCAGCGAAGA             | TCAGATACCACAAAGCACCA             |
| <i>Gab2</i>   | ACAGTACCTACGACCTCCCC             | CTGGGCGTCTTGAAGGTGTA             |
| <i>Jak1</i>   | AGACTTGTGAATACGTAAAAGAAGGA       | AAAGCTTGTCCGATTGGATG             |
| <i>ErBb2</i>  | TGTGACTGCCTGTCCCTACAA            | CCAGACCATAGCACACTCGG             |
| <i>PDGFRβ</i> | GCACCGAAACAAACACACCTT            | ATGTAACCACCGTCGCTCTC             |
| <i>MET</i>    | CCATCCAGTGTCTCCAGAAGTG           | TTCCCAGTGATAACCAGTGTGTAG         |
| <i>MER</i>    | ACAGGTTCTGGGACGTCCATC            | CCGGAATAGCGGGTAAGGC              |
| <i>PIK3CA</i> | AATGCTTGGGGTGAAGGGAC             | GGGGTGCAAACAATGCATGAC            |
| <i>AXL</i>    | TACCGCCAGGGACGTATCGC             | CCAGCACCGCGACATCAAGG             |
| <i>GAS6</i>   | TGGCGCGGAATCTGGTCATC             | GAAGCACTGCATCCTCGTGTTT           |
| <i>PDPK1</i>  | CAGAGGTCAGGCAGCAACATAGAG         | ACGTCCTGTTAGGCGTGTGG             |
| <i>EPHA2</i>  | CCGGCTACACTGCCATCGAG             | GCCCAGCATCCCTGGTCATC             |
| <i>TYRO3</i>  | AACATCTTGGGCCAGCTGTCTG           | GATTTGGTCAGTCCGGGCTTC            |
| <i>PTEN</i>   | GACCCACACGACGGGAAGAC             | GCCTCTGGATTGACGGCTCC             |
| <i>TWIST1</i> | CATGTCCGCGTCCCACTAG              | TGTCCATTTTCTCCTTCTCTGG           |
| <i>PTK2</i>   | GCCTTAACAATGCGTCAGTTTGACC        | AAATGACCTCAGCTCTCCAAGTGTG        |
| <i>FGFR1</i>  | GCATCATAATGGACTCTGTGGTG          | GTGGTTGATGCTGCCGTAATC            |
| <i>FGFR2</i>  | CGCTGGTGAGGATAACAACACG           | TTCCGCCATGACCACTTGCC             |
| <i>FGFR3</i>  | TACCGTGCTCAAGGTGTCCC             | TTGCAGGTGTGAAGGAGTAGTC           |
| <i>FGFR4</i>  | GGGGAGAACCGCATTGGAGG             | ACACGTTCCGCAGGTACAGG             |
| <i>GAPDH</i>  | GCACCGTCAAGGCTGAGAAC             | TGGTGAAGACGCCAGTGA               |
